# Supplementary material
Source: PubMed Central journal article supplement (PMC3260065)
Supplement: supp_111.024927_ajcn024927_ST1-ST4.pdf [file supp_111.024927_ajcn024927_ST1-ST4.pdf]

1 **ONLINE SUPPLEMENTAL MATERIAL**

2 Multiple imputation (MI) was used as a sensitivity analysis to supplement the intent-to-  
3 treat with last observation carried forward (ITT-LOCF) approach (**Supplemental Tables**  
4 **1 and 2**). MI was applied to all enrolled subjects, thereby adhering strictly to the ITT  
5 principle while accommodating missing data. Five imputed data sets were used per  
6 analysis. We used a 2-step imputation process involving treatment assignment, gender,  
7 and all measurements of the efficacy variable under study. First, sufficient imputations  
8 were done to achieve a monotone missing data pattern using a Markov Chain Monte  
9 Carlo algorithm. Next, all remaining missing data were imputed under the assumption of  
10 a monotone missing data pattern via Rubin's regression method (1). The 5 complete  
11 imputed datasets were analyzed with analysis of covariance (ANCOVA) including terms  
12 for treatment assignment, sex, and baseline as fixed effect covariates. Finally, using  
13 methods described by Schafer (2), the separate results from each of the 5 imputed data  
14 sets were pooled into single estimates and tested.

15  
16 **Analysis of subjects who completed the study while actively taking study drug was also**  
17 **performed to understand the effect of treatment following 108 weeks of exposure**  
18 **(Supplemental Tables 3 and 4). Similar to the LOCF analyses, treatment comparisons**  
19 **were performed using an ANCOVA with fixed effects for treatment, gender, and diabetic**  
20 **status and baseline as a covariate.**

21

1 Conclusions of statistical significance and the order of magnitude of effect estimates  
2 were consistent for the MI approach and completer analyses when compared to the  
3 ITT-LOCF approach for all variables.

4

5 **REFERENCES:**

6 1. Rubin DB. Multiple imputation for non-response in surveys. Wiley series in probability  
7 and mathematical statistics. New York: John Wiley & Sons, 1987.

8 2. Schafer JL. Analysis of incomplete multivariate data (monographs on statistics and  
9 applied probability 72). London: Chapman & Hall/CRC, 1997.

10

**Supplemental Table 1. Least-Squares Mean (95% CI) Estimates and Treatment Comparisons From Multiple Imputation at Week 108**

|                                    | <b>Standardized Lifestyle Intervention Across All Treatment Groups</b> |                                                                |                                |                                                               |                                |                                                              |
|------------------------------------|------------------------------------------------------------------------|----------------------------------------------------------------|--------------------------------|---------------------------------------------------------------|--------------------------------|--------------------------------------------------------------|
| <b>Parameter</b>                   | <b>Placebo<br/>(n = 227)</b>                                           | <b>Phentermine/<br/>Topiramate CR<br/>7.5/46<br/>(n = 154)</b> | <b><i>P</i> vs<br/>Placebo</b> | <b>Phentermine/<br/>Topiramate CR<br/>15/92<br/>(n = 295)</b> | <b><i>P</i> vs<br/>Placebo</b> | <b><i>P</i> vs Phentermine/<br/>Topiramate CR<br/>7.5/46</b> |
| Percent weight loss                | -2.5 (-3.4,<br>-1.6)                                                   | -10.3 (-11.6, -<br>9.0)                                        | < 0.0001                       | -11.2 (-12.2, -<br>10.3)                                      | < 0.0001                       | < 0.1693                                                     |
| Waist circumference,<br>cm         | -4.2 (-5.2,<br>-3.1)                                                   | -10.4 (-11.7, -<br>9.1)                                        | < 0.0001                       | -11.1 (-12.0, -<br>10.2)                                      | < 0.0001                       | 0.4156                                                       |
| Systolic blood<br>pressure, mm Hg  | -3.5 (-5.2,<br>-1.9)                                                   | -4.6 (-6.6, -2.5)                                              | 0.4202                         | -4.4 (-5.9, -2.9)                                             | 0.4053                         | 0.9155                                                       |
| Diastolic blood<br>pressure, mm Hg | -3.6 (-4.7,<br>-2.5)                                                   | -3.6 (-5.0, -2.1)                                              | 0.9403                         | -3.1 (-4.2, -2.1)                                             | 0.5236                         | 0.6545                                                       |
| Triglycerides, %                   | -0.5 (-5.6,<br>-1.6)                                                   | -13.6 (-20.0, -<br>7.2)                                        | 0.0014                         | -15.0 (-19.8, -<br>10.2)                                      | < 0.0001                       | 0.7379                                                       |

|                      |                     |                    |        |                    |          |        |
|----------------------|---------------------|--------------------|--------|--------------------|----------|--------|
| change               | 4.7)                | 7.3)               |        | 10.1)              |          |        |
| HDL-C, % change      | 4.9 (2.4, 7.5)      | 7.8 (4.6, 11.0)    | 0.1659 | 12.6 (10.3, 14.9)  | < 0.0001 | 0.0137 |
| LDL-C, % change      | -10.8 (-13.7, -7.9) | -4.6 (-8.2, -1.1)  | 0.0080 | -5.8 (-8.4, -3.2)  | 0.0110   | 0.5934 |
| Non-HDL-C (% change) | -9.5 (-12.0, -7.0)  | -8.7 (-11.8, -5.6) | 0.6762 | -9.5 (-11.7, -7.2) | 0.9838   | 0.6784 |

Data are LS mean change (95% CI) or LS mean percent change (95% CI). Standardized lifestyle intervention was used across all treatment groups. CI, confidence interval; HDL-C, high-density lipoprotein cholesterol; LDL-C, low-density lipoprotein cholesterol

**Supplemental Table 2. Percentage of Subjects Achieving Weight Loss Threshold and Treatment Comparisons  
From Multiple Imputation at Week 108**

| Parameter         | Standardized Lifestyle Intervention Across All Treatment Groups |                                                      |                        |                                                     |                        |                                                        |
|-------------------|-----------------------------------------------------------------|------------------------------------------------------|------------------------|-----------------------------------------------------|------------------------|--------------------------------------------------------|
|                   | Placebo<br>(n = 227)                                            | Phentermine/<br>Topiramate CR<br>7.5/46<br>(n = 154) | <i>P</i> vs<br>Placebo | Phentermine/<br>Topiramate CR<br>15/92<br>(n = 295) | <i>P</i> vs<br>Placebo | <i>P</i> vs<br>Phentermine/<br>Topiramate CR<br>7.5/46 |
| ≥ 5% weight loss  | 28.9%                                                           | 74.3%                                                | < 0.0001               | 79.7%                                               | < 0.0001               | < 0.0001                                               |
| ≥ 10% weight loss | 11.6%                                                           | 50.6%                                                | 0.0002                 | 53.0%                                               | < 0.0001               | < 0.0001                                               |
| ≥ 15% weight loss | 6.9%                                                            | 23.8%                                                | 0.0028                 | 31.6%                                               | 0.0009                 | < 0.0001                                               |
| ≥ 20% weight loss | 2.1%                                                            | 9.4%                                                 | 0.0817                 | 14.9%                                               | 0.0571                 | 0.0030                                                 |

Data represent percentage of subjects. Standardized lifestyle intervention was used across all treatment groups.

**Supplemental Table 3. Least-Squares Mean (95% CI) Estimates and Treatment Comparisons for Completers on Study Drug at Week 108**

|                                 | Standardized Lifestyle Intervention Across All Treatment Groups |                   |     |                                         |                        |     |                                        |                        |                                                        |
|---------------------------------|-----------------------------------------------------------------|-------------------|-----|-----------------------------------------|------------------------|-----|----------------------------------------|------------------------|--------------------------------------------------------|
| Parameter                       | n                                                               | Placebo           | n   | Phentermine/<br>Topiramate CR<br>7.5/46 | <i>P</i> vs<br>Placebo | n   | Phentermine/<br>Topiramate CR<br>15/92 | <i>P</i> vs<br>Placebo | <i>P</i> vs<br>Phentermine/<br>Topiramate<br>CR 7.5/46 |
| Percent weight loss             | 196                                                             | -2.2 (-3.3, -1.0) | 125 | -9.3 (-10.7, -7.8)                      | < 0.0001               | 240 | -10.7 (-11.8, -9.7)                    | < 0.0001               | 0.0879                                                 |
| Waist circumference, cm         | 196                                                             | -4.1 (-5.3, -2.9) | 125 | -10.1 (-11.6, -8.6)                     | < 0.0001               | 240 | -10.8 (-11.9, -9.7)                    | < 0.0001               | 0.4062                                                 |
| Systolic blood pressure, mm Hg  | 196                                                             | -3.1 (-4.9, -1.3) | 125 | -4.0 (-6.2, -1.8)                       | 0.5130                 | 240 | -4.0 (-5.7, -2.4)                      | 0.4101                 | 0.9683                                                 |
| Diastolic blood pressure, mm Hg | 196                                                             | -3.7 (-4.9, -2.5) | 125 | -3.6 (-5.1, -2.1)                       | 0.9104                 | 240 | -3.2 (-4.3, -2.1)                      | 0.4890                 | 0.6267                                                 |
| Triglycerides, %                | 194                                                             | -1.8 (-7.2, -1.3) | 125 | -12.4 (-19.4, -5.4)                     | 0.0113                 | 240 | -15.3 (-20.5, -10.1)                   | 0.0001                 | 0.4687                                                 |

|                     |     |                     |     |                    |        |     |                    |        |        |
|---------------------|-----|---------------------|-----|--------------------|--------|-----|--------------------|--------|--------|
| change              |     | 3.7)                |     | -5.5)              |        |     | -10.2)             |        |        |
| HDL-C, % change     | 194 | 5.4 (2.5, 8.4)      | 125 | 7.6 (3.9, 11.3)    | 0.3347 | 240 | 12.6 (9.9, 15.3)   | 0.0002 | 0.0203 |
| LDL-C, % change     | 193 | -11.0 (-14.2, -7.7) | 123 | -3.9 (-8.0, 0.2)   | 0.0046 | 238 | -6.3 (-9.4, -3.3)  | 0.0272 | 0.3016 |
| Non-HDL-C, % change | 194 | -10.2 (-13.0, -7.5) | 125 | -8.5 (-12.0, -5.1) | 0.4263 | 240 | -9.9 (-12.5, -7.4) | 0.8696 | 0.4932 |

Data are LS mean change (95% CI) or LS mean percent change (95% CI). Standardized lifestyle intervention was used across all treatment groups. CI, confidence interval, HDL-C, high-density lipoprotein cholesterol; LDL-C, low-density lipoprotein cholesterol

**Supplemental Table 4. Percentage of Subjects Achieving Weight Loss Threshold and Treatment Comparisons for Completers on Study Drug at Week 108**

| Parameter         | Standardized Lifestyle Intervention Across All Treatment Groups |                                                      |                        |                                                     |                        |                                                        |
|-------------------|-----------------------------------------------------------------|------------------------------------------------------|------------------------|-----------------------------------------------------|------------------------|--------------------------------------------------------|
|                   | Placebo<br>(n = 196)                                            | Phentermine/<br>Topiramate CR<br>7.5/46<br>(n = 125) | <i>P</i> vs<br>Placebo | Phentermine/<br>Topiramate CR<br>15/92<br>(n = 240) | <i>P</i> vs<br>Placebo | <i>P</i> vs<br>Phentermine/<br>Topiramate CR<br>7.5/46 |
| ≥ 5% weight loss  | 30.1%                                                           | 73.6%                                                | < 0.0001               | 81.3%                                               | < 0.0001               | 0.0552                                                 |
| ≥ 10% weight loss | 12.2%                                                           | 49.6%                                                | < 0.0001               | 54.2%                                               | < 0.0001               | 0.2921                                                 |
| ≥ 15% weight loss | 7.1%                                                            | 24.0%                                                | 0.0001                 | 32.5%                                               | < 0.0001               | 0.0530                                                 |
| ≥ 20% weight loss | 2.0%                                                            | 9.6%                                                 | 0.0083                 | 15.4%                                               | < 0.0001               | 0.0846                                                 |

Data represent percentage of subjects. Standardized lifestyle intervention was used across all treatment groups.



1 **Supplemental Figure 1. Weight loss by baseline BMI category.**

2 LS mean percent loss (95% CI) from baseline (Week 0) to Week 108. Standardized lifestyle intervention was used across  
3 all treatment groups. \* $P = 0.0061$  vs placebo; † $P = 0.0057$  vs placebo; ‡ $P < 0.0001$  vs placebo; § $P = 0.0001$  vs placebo.

4 BMI, body mass index; CI, confidence interval; LS, least-squares; PHEN/TPM CR, controlled-release

5 phentermine/topiramate.
