# Supplementary material
Source: PubMed Central journal article supplement (PMC3260065)

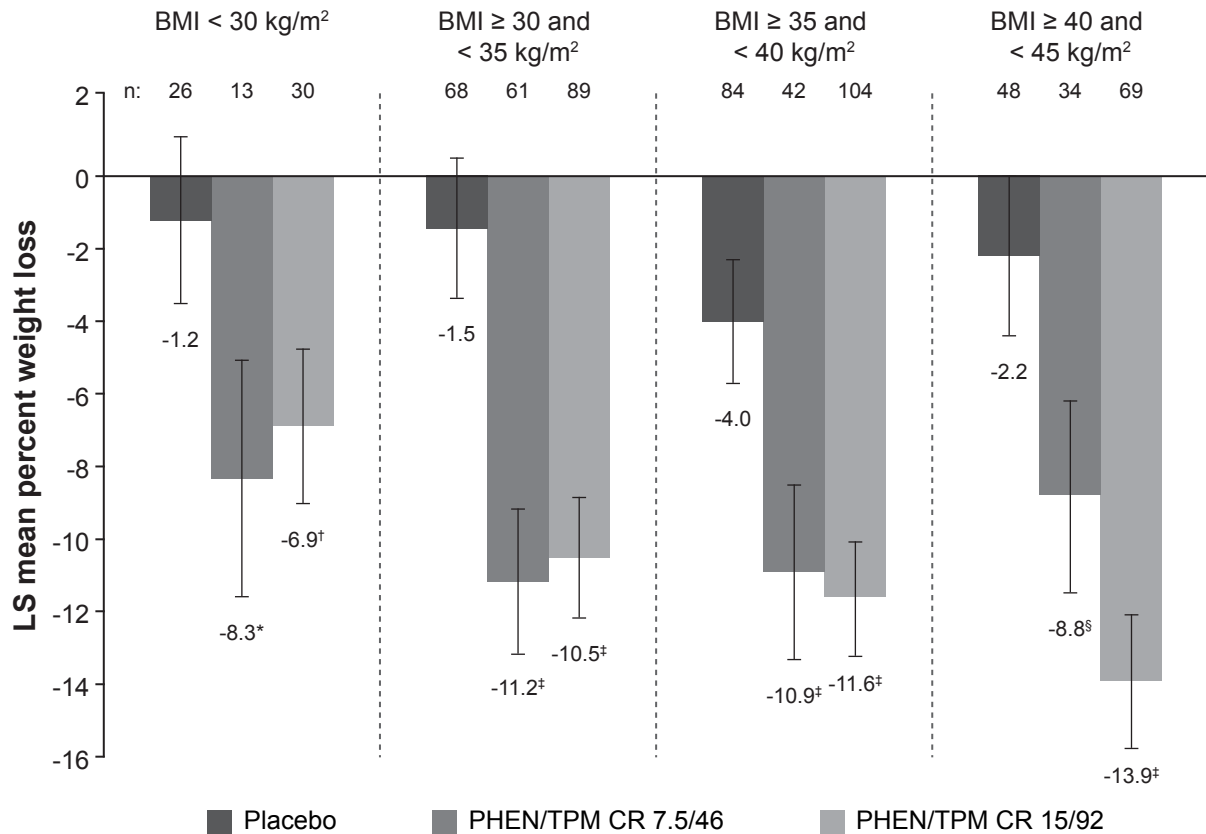

Supplement: supp_111.024927_ajcn024927_SF1.pdf [file supp_111.024927_ajcn024927_SF1.pdf]
